# Supplementary material for: miR‐24 and its target gene Prdx6 regulate viability and senescence of myogenic progenitors during aging
Source: PubMed Central journal article supplement (PMC8520721; doi:10.1111/acel.13475), 2021-09-24
Supplement: ACEL-20-e13475-s001.pdf [file ACEL-20-e13475-s001.pdf]

**Fig. S1**

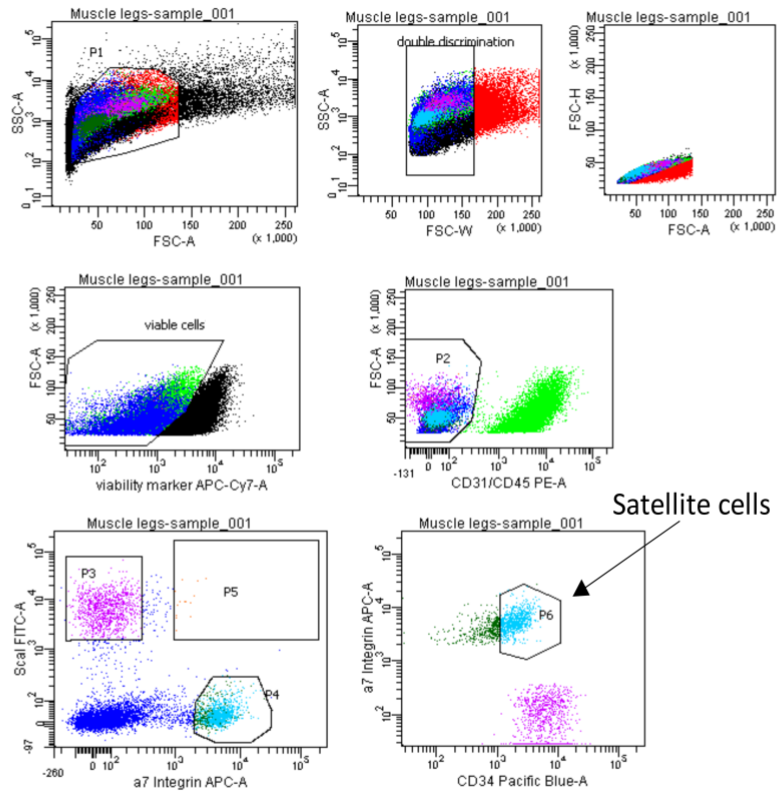

**Fig. S2**

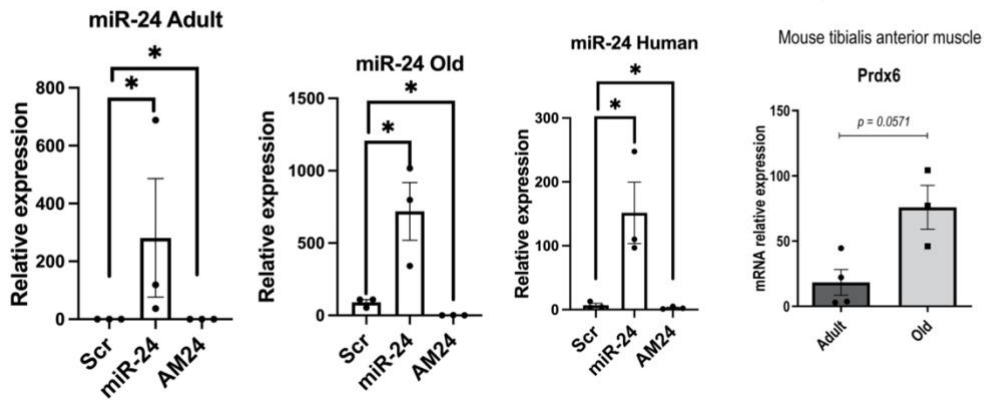

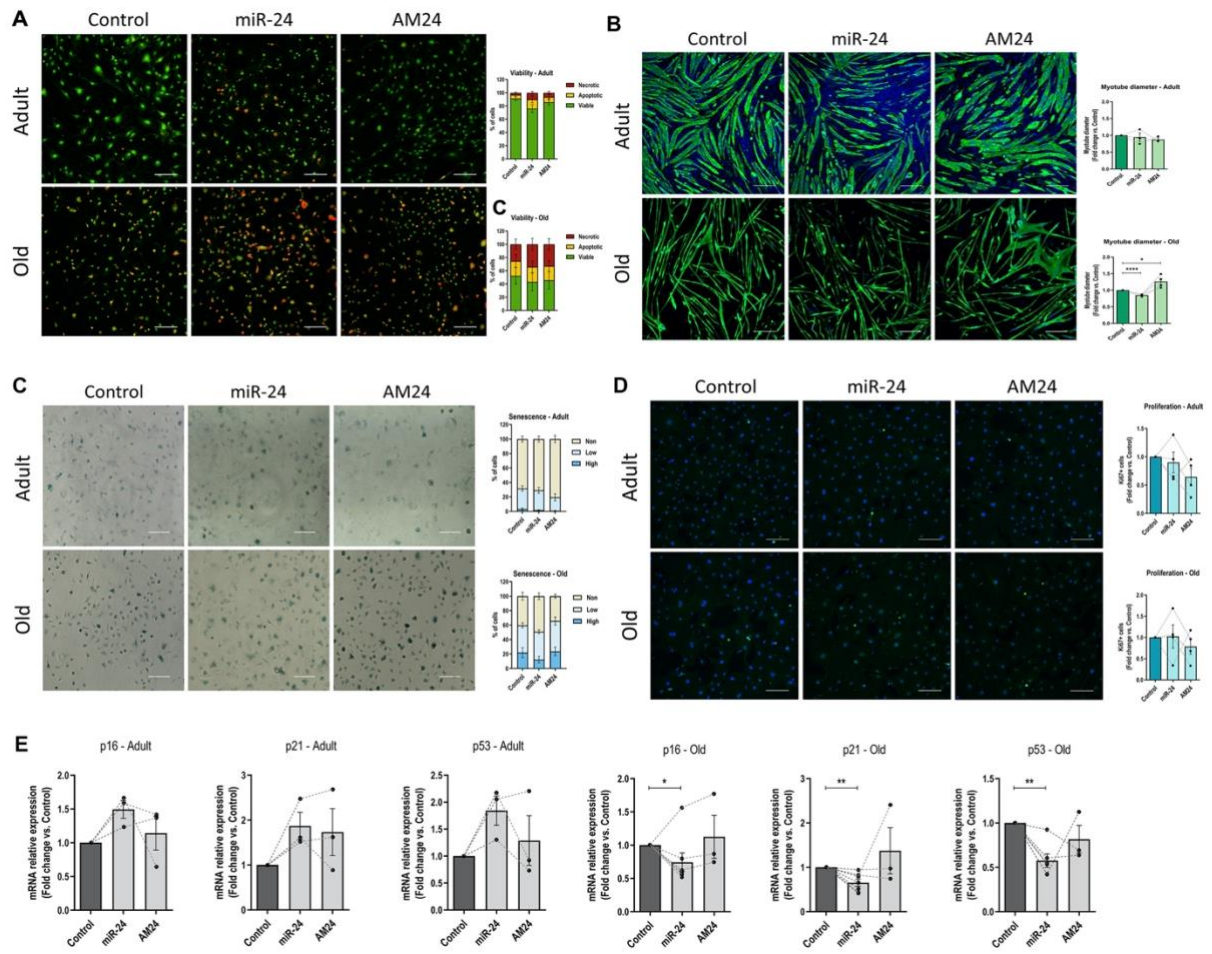

Figure S3.

# Human primary myoblasts

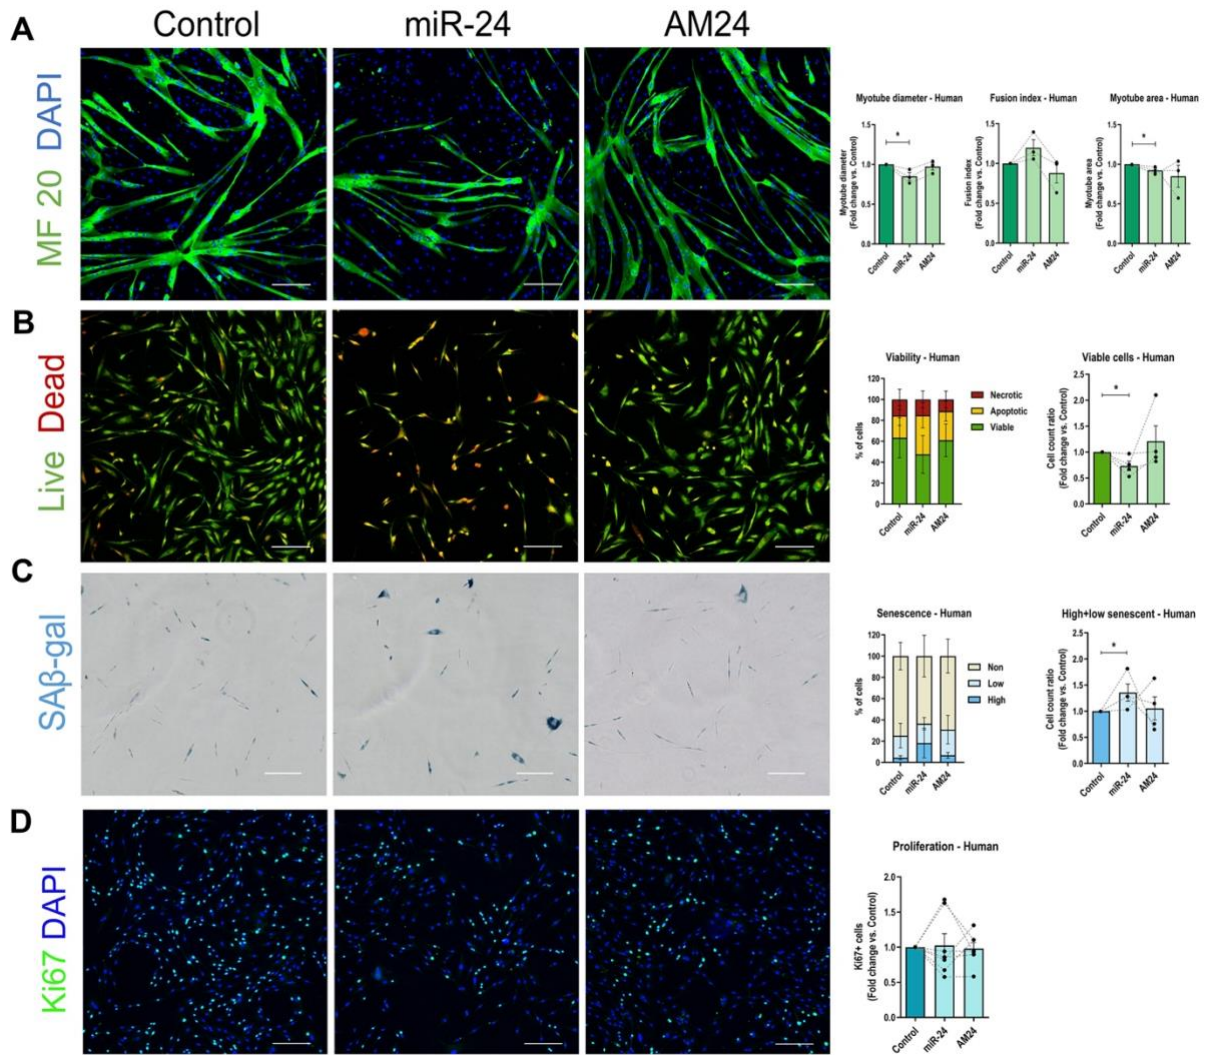

Figure S4.

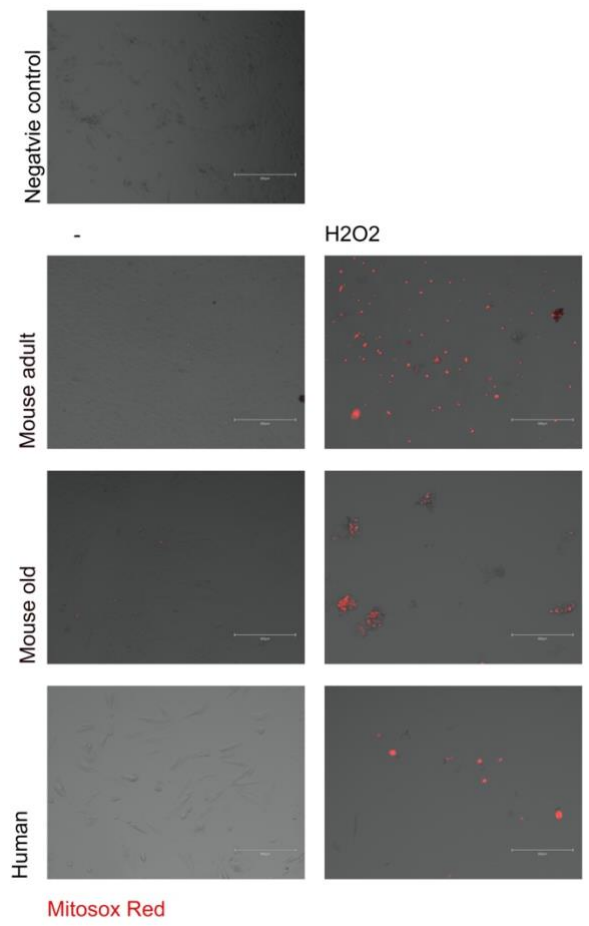

Figure S5.

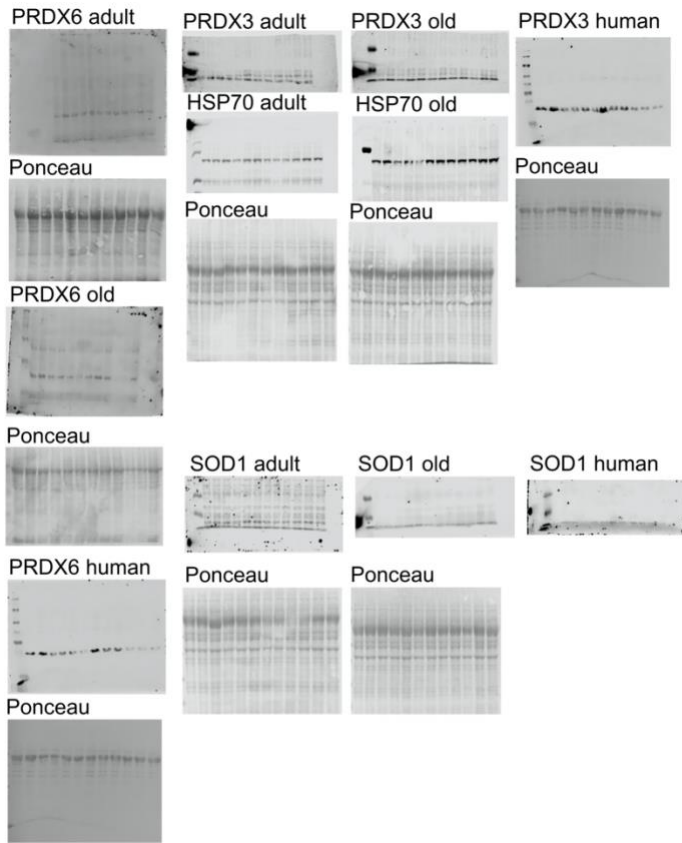

Figure S6.
